# Supplementary material for: Impact of Perfluoropentane Microdroplets Diameter and Concentration on Acoustic Droplet Vaporization Transition Efficiency and Oxygen Scavenging
Source: MDPI journal article supplement (doi:10.3390/pharmaceutics14112392), 2022-11-05
Supplement: s1 [file s1]

**Table S1.** Average droplet separation for each nominal droplet diameter at the lowest and highest droplet concentrations used.

| Nominal<br>Diameter ( $\mu\text{m}$ ) | Average distance between droplets<br>( $\mu\text{m}$ ) for concentration of<br>$5.1 \times 10^{-5}$ mL/mL | Average distance between droplets<br>( $\mu\text{m}$ ) for concentration of<br>$6.5 \times 10^{-3}$ mL/mL |
|---------------------------------------|-----------------------------------------------------------------------------------------------------------|-----------------------------------------------------------------------------------------------------------|
| 1                                     | 22                                                                                                        | 4                                                                                                         |
| 3                                     | 65                                                                                                        | 13                                                                                                        |
| 5                                     | 109                                                                                                       | 22                                                                                                        |
| 7                                     | 152                                                                                                       | 30                                                                                                        |
| 9                                     | 196                                                                                                       | 39                                                                                                        |
| 12                                    | 261                                                                                                       | 52                                                                                                        |
